# 1 **A genetically validated approach to detect inorganic polyphosphates in plants.**

2

3 Jinsheng Zhu<sup>1</sup>, Sylvain Loubéry<sup>2</sup>, Larissa Broger<sup>1</sup>, Laura Lorenzo-Orts<sup>1</sup>, Anne Utz-Pugin<sup>2</sup>, Chang  
4 Young-Tae<sup>3</sup>, Michael Hothorn<sup>1,\*</sup>

5

6 <sup>1</sup>Structural Plant Biology Laboratory, Department of Botany and Plant Biology, University of Geneva,  
7 Switzerland

8 <sup>2</sup>Department of Botany and Plant Biology, University of Geneva, Switzerland

9 <sup>3</sup>Center for Self-assembly and Complexity, IBS & Department of Chemistry, POSTECH, Republic of  
10 Korea

11

12 \*correspondence to [michael.hothorn@unige.ch](mailto:michael.hothorn@unige.ch)

13

14

## 15 **Abstract**

16 Inorganic polyphosphates (polyPs) are linear polymers of orthophosphate units linked by  
17 phosphoanhydride bonds. PolyPs represent important stores of phosphate and energy, and are  
18 abundantly found in many pro- and eukaryotic organisms. In plants, the existence of polyPs has been  
19 established using microscopy and biochemical extraction methods that are now known to produce  
20 artifacts. Here we use a polyP-specific dye and a polyP binding domain to detect polyPs in plant and  
21 algal cells. To develop the staining protocol, we induced polyP granules in *Nicotiana tabacum* and  
22 *Arabidopsis* cells by heterologous expression of *E. coli* polyphosphate kinase 1 (PPK1). Over-expression  
23 of PPK1 but not of a catalytically impaired version of the enzyme lead to severe growth phenotypes,  
24 suggesting that ATP-dependent synthesis and accumulation of polyPs in the plant cytosol is toxic. We  
25 next crossed stable PPK1 expressing *Arabidopsis* lines with plants expressing the polyP-binding  
26 domain of *E. coli* exopolyphosphatase (PPX1c), which co-localized with PPK1-generated polyP  
27 granules. These granules were stained by the polyP-specific dye JC-D7 and appeared as electron dense  
28 structures in transmission electron microscopy (TEM) sections. Using the polyP staining protocol  
29 derived from these experiments, we screened for polyP stores in different organs and tissues of both  
30 mono- and dicotyledonous plants. While we could not detect polyP granules in higher plants, we could  
31 visualize the polyP-rich acidocalicisomes in the green algae *Chlamydomonas reinhardtii*. Together, our  
32 experiments suggest that higher plants may not contain large polyPs stores.

33

## 34 **Keywords**

35 inorganic polyphosphate, energy metabolism, polyphosphate kinase, polyphosphate phosphatase,  
36 Arabidopsis, Chlamydomonas

37

## 38 **Significance Statement**

39 A chemical dye and an inorganic polyphosphate binding domain are shown to specifically label  
40 inorganic polyphosphate granules in transgenic Arabidopsis lines and Chlamydomonas  
41 acidocalcisomes. Using these tools, we show that in contrast to many prokaryotic and eukaryotic  
42 organisms, higher plants do not seem to contain large inorganic polyphosphate stores.

43

## 44 **Introduction**

45 PolyPs are linear inorganic phosphate (Pi) polymers, with sizes ranging from tripolyphosphate  
46 (3 Pi units) to long-chain polyPs (~1,000 Pi units) (Kornberg, 1956; Kornberg *et al.*, 1957; Kulaev and  
47 Vagabov, 1983; Clark and Wood, 1987). In bacteria, polyPs accumulate in volutin granules (Babes,  
48 1895; Widra, 1959; Tumlirsch and Jendrossek, 2017) or in membrane-surrounded acidocalcisomes  
49 (Seufferheld *et al.*, 2003). Bacterial polyPs are synthesized by two different classes of polyphosphate  
50 kinases PPK1 (Kornberg, 1957; Ahn and Kornberg, 1990) and PPK2 (Zhang *et al.*, 2002) from ATP or  
51 GTP, respectively. In yeast and other fungi, large amounts of long-chain polyPs (Macfarlane, 1936)  
52 generated by the vacuolar transporter chaperone (VTC) complex (Hothorn *et al.*, 2009) accumulate in  
53 the vacuole (Urech *et al.*, 1978) and in the cell wall (Werner *et al.*, 2007b). The eukaryotic VTC  
54 complex is conserved among other unicellular eukaryotes such as protozoa (Fang *et al.*, 2007) and  
55 green algae (Aksoy *et al.*, 2014), organisms that store polyPs in specialized vacuoles termed  
56 acidocalcisomes (Docampo and Huang, 2016) and also in their cell walls (Werner *et al.*, 2007a). The  
57 eukaryotic amoeba *Dictyostelium discoideum* contains polyP accumulating acidocalcisomes but lacks  
58 the VTC complex. Instead *Dictyostelium* features two polyphosphate kinases that are similar to  
59 bacterial PPK1 (Zhang *et al.*, 2005) and to an actin-related protein (Gómez-García and Kornberg,  
60 2004), respectively. Neither PPK1, PPK2 nor the VTC complex appear to be present in higher  
61 eukaryotes (Hooley *et al.*, 2008), but polyPs of various chain-length have been identified in  
62 mitochondria and lysosomes of different animal and human cells and tissues (Pisoni and Lindley, 1992;  
63 Kumble and Kornberg, 1995). PolyPs also accumulate in acidocalcisomes in human platelet and mast  
64 cells (Ruiz *et al.*, 2004; Moreno-Sanchez *et al.*, 2012).

65 Invasive and non-invasive polyP detection techniques have been developed and applied to  
66 detect specific polyP stores in bacteria, fungi and algae, all of which accumulate polyP to high levels.

67 Initially, polyP bodies were detected in microorganisms as metachromatic granules in light microscopy  
68 experiments, and stained with unspecific dyes such as toluidine blue (Meyer, 1904). Using this method,  
69 polyP granules were reported from lower plants, including algae and different mosses (Keck and Stich,  
70 1957). In TEM sections, electron dense granules have been interpreted as polyP bodies or  
71 acidocalcisomes, for example in the seeds of different palm species and in rice anthers (DeMason and  
72 Stillman, 1986; Mamun *et al.*, 2005).

73 PolyPs can also be biochemically purified and initially the acid-labile polymer was converted to  
74 Pi using strong acids. This rather unspecific and insensitive method was used early on to characterize  
75 polyP stores in spinach leaves and in parasitic plants (Miyachi, 1961; Tewari and Singh, 1964). The  
76 identification of highly specific bacterial and fungal polyP metabolizing enzymes, such as *E. coli* PPK1  
77 (which can also catalyze the reverse reaction, the phosphorylation of ADP to ATP using polyP as a  
78 phosphate donor) or the *E. coli* (Akiyama *et al.*, 1993) and *S. cerevisiae* (Wurst and Kornberg, 1994)  
79 exopolyphosphatase PPX1, has enabled the enzymatic identification and quantification of polyPs  
80 extracted from cells and tissues (Ault-Riché and Kornberg, 1999; Bru *et al.*, 2016). This method has, to  
81 the best of our knowledge, not been applied to study polyP stores in higher plants.

82 The isolated polyP-binding domain of *E. coli* PPX1 has been used to immunolocalize polyPs in  
83 fungal, algae and human cells (Saito *et al.*, 2005; Werner *et al.*, 2007b; Werner *et al.*, 2007a; Jimenez-  
84 Nuñez *et al.*, 2012). PolyPs of different chain length can also be visualized on UREA-PAGE gels,  
85 either using radioactive <sup>32</sup>P, toluidine blue or 4',6-diamidino-2-phenylindol (DAPI) (Ogawa *et al.*, 2000;  
86 Smith and Morrissey, 2007). *In vivo* <sup>31</sup>P nuclear magnetic resonance spectroscopy has been used to  
87 define phosphate-containing metabolites in cells and tissues, including polyP in bacteria and lower  
88 eukaryotes (Moreno *et al.*, 2000). Raman spectroscopy has been used to detect Pi-rich inositol  
89 polyphosphates, but not inorganic polyphosphates in wheat grains (Kolozsvari *et al.*, 2015). *In situ*  
90 staining methods for polyP have been developed using DAPI (Kulakova *et al.*, 2011). Its unique  
91 emission spectrum allows to distinguish polyP from nucleic acids (also interacting with DAPI), but not  
92 from inositol polyphosphates also abundant in plants (Kolozsvari *et al.*, 2014). Two specific dyes for  
93 polyP, JC-D7 and JC-D8 have been developed and employed to localize polyP stores in mammalian  
94 cells.

95 We have recently uncovered a molecular connection between the Pi starvation response  
96 controlled by inositol pyrophosphate (PP-InsPs) signaling molecules and their SPX receptors, and  
97 polyP metabolism in yeast (Wild *et al.*, 2016). PP-InsPs and SPX domains also control the Pi starvation  
98 response in Arabidopsis (Zhu *et al.*, 2018), and we have characterized the short-chain polyphosphatase  
99 TRIPHOSPHATE TUNNEL METALLOENZYME 3 (AtTTM3) (Martinez *et al.*, 2015; Lorenzo-Orts,

100 Witthoef, *et al.*, 2019) and a specific polyP-binding domain (Lorenzo-Orts, Hohmann, *et al.*, 2019) in  
101 plants. We thus speculate that polyPs may exist in plants and that they could form a relevant Pi store.  
102 Here we make use of both the JC-D7 dye (Angelova *et al.*, 2014) and the PPX1 polyP-binding domain  
103 to probe for the presence of polyP stores in different plant cells and tissues.

104

## 105 **Results**

106 To test if JC-D7 (Angelova *et al.*, 2014) can label polyP in intact plant cells we sought to  
107 introduce defined polyP stores, allowing for a genetically validated detection of polyP. To this end, we  
108 generated transgenic Arabidopsis lines expressing the bacterial polyphosphate kinase PPK1 from *E.*  
109 *coli*, which polymerizes long-chain polyPs from ATP (Kornberg, 1957; Ahn and Kornberg, 1990),  
110 under the control of the Ubi10 promoter and carrying a C-terminal mCitrine (mCit) tag (see Methods).  
111 EcPPK1 has been previously characterized as a histidine kinase, and mutation of His435 to alanine  
112 impaired polyP accumulation in *E. coli* (Kumble *et al.*, 1996). The crystal structure of EcPPK1 in  
113 complex with a non-hydrolyzable substrate analog revealed that His435 and His592 are in direct  
114 contact with the  $\beta$ - and  $\gamma$ -phosphates of the ATP substrate (Figure 1a) (Zhu *et al.*, 2005). Based on this  
115 analysis, we generated a control line expressing a catalytically impaired PPK1 (mPPK1), in which  
116 His435 and His592 are replaced by alanine. PPK1-mCit T3 lines displayed a strong growth phenotype  
117 with small purple leaves, which correlates with PPK1-mCit protein levels (Figure 1b,c). The mPPK1-  
118 mCit control lines are similar to wild-type.

119 mPPK1-mCit control plants show a uniform expression of the fusion protein in root tips (Figure  
120 2). In contrast, expression of the catalytically active PPK1-mCit is patchy, with some cells  
121 accumulating the fusion protein to high levels and others showing small punctate structures. These  
122 punctate structures appear as dense granules in the corresponding bright field images (Figure 2).

123 We next tested if ectopic expression of PPK1 introduces polyP stores in plant cells and if those  
124 stores can be detected using the JC-D7 dye. We transiently expressed the PPK1-mCit and mPPK1-mCit  
125 constructs in *Nicotiana tabacum* leaves, where we again found mPPK1-mCit to be evenly distributed in  
126 the cytosol, while PPK1-mCit localized in punctate structures (Figure 3a). We stained epidermal cells  
127 with JC-D7 (see Methods), and found the dye to co-localize with the punctate structures in PPK1-mCit  
128 expressing cells, but not in the mPPK1-mCit control (Figure 3a). We hypothesized that PPK1-mCit  
129 localized to polyP granules generated by the bacterial enzyme, which are labeled by JC-D7. To test this  
130 hypothesis, we used the polyP binding domain of the *E. coli* exopolyphosphatase PPX1 (Akiyama *et al.*,  
131 1993), which has been previously employed to specifically stain polyP stores in fungal, algal and  
132 human cells (Saito *et al.*, 2005; Werner *et al.*, 2007a; Werner *et al.*, 2007b; Jimenez-Nuñez *et al.*,

133 2012). To this end, we generated a PPXc – mCherry (mChe) fusion protein (residues 311-508; Figure  
134 3b). We found PPXc-mChe to localize to the cytoplasm and nucleus when transiently expressed in  
135 *Nicotiana tabacum*, and in stable transgenic Arabidopsis lines (Figure 3c). Next, we crossed PPX1c-  
136 mChe with our PPK1-mCit and mPPK1-mCit lines, which revealed PPXc-mChe to co-localize with  
137 PPK1-mCit in JC-D7 stained granules in hypocotyl cells (Figure 3d). This was not observed in the  
138 mPPK1-mCit control lines (Figure 3d). Co-localization of PPK1-mCit, PPXc-mChe and the JC-D7 dye  
139 could also be observed in fixed leaf epidermal and hypocotyl cells in Arabidopsis (Figure S1). TEM  
140 analysis of hypocotyl sections revealed the presence of electron-dense granules in PPK1-mCit but not  
141 in mPPK1-mCit expressing lines (Figure 4). Together, these experiments suggest that PPK1 introduces  
142 polyP granules in Arabidopsis, which can be detected by both the JC-D7 dye and the PPX1c polyP-  
143 binding domain.

144 While we could readily detect PPK1-generated polyP granules in different cells and tissues  
145 from Arabidopsis and tobacco, we could not reproducibly detect JC-D7 stained structures in Col-0  
146 wild-type (Figures S2, S3). PolyP also did not accumulate in a previously characterized loss-of-  
147 function mutant of AtTTM3 (*ttm3-1*) (Moeder *et al.*, 2013; Lorenzo-Orts, Witthoef, *et al.*, 2019).  
148 (Figures S2, S3). We next stained different mono- and dicots using the JC-D7 dye (examples are shown  
149 in Figure S4) but again could not detect a polyP-specific signal. In contrast, JC-D7 stained the  
150 previously characterized polyP containing acidocalcisomes of *Chlamydomonas reinhardtii*, which  
151 appeared enriched in a sulfur depleted growth condition (Gal *et al.*, 2018; Aksoy *et al.*, 2014) (Figure  
152 5).

153

## 154 Discussion

155 PolyPs are evolutionary ancient energy polymers and have been identified in a variety of pro-  
156 and eukaryotic organisms (Rao *et al.*, 2009). Based on earlier reports (Keck and Stich, 1957; Miyachi,  
157 1961; Tewari and Singh, 1964; DeMason and Stillman, 1986), polyPs have been assumed to exist in  
158 higher plants (Clark and Wood, 1987; Kornberg *et al.*, 1999; Kulaev, 2005). However, just like in  
159 animals the synthesis, storage and breakdown of polyP has been poorly characterized and no  
160 physiological functions have been assigned to polyP in plants. In the green algae *Chlamydomonas*  
161 *reinhardtii* polyP stores have been identified in acidocalcisomes (Ruiz *et al.*, 2001; Gal *et al.*, 2018) and  
162 in the cell wall compartment (Werner *et al.*, 2007a), as it has been seen in other unicellular eukaryotes  
163 such as yeast or trypanosomes (Docampo and Huang, 2016). PolyP in *Chlamydomonas* is synthesized  
164 by the vacuolar transporter chaperone VTC complex (Aksoy *et al.*, 2014), whose catalytic subunit Vtc4  
165 generates polyP from ATP (Hothorn *et al.*, 2009), and translocates the growing polymer to the

166 vacuole/acidocalcisome using a membrane pore (Gerasimaitė *et al.*, 2014). While the VTC complex is  
167 apparently absent in higher plants, proteins sharing structural homology with the Vtc4 catalytic domain  
168 exist in Arabidopsis (Moeder *et al.*, 2013; Martinez *et al.*, 2015; Ung *et al.*, 2017). We have previously  
169 characterized AtTTM3 as a specific short-chain inorganic polyphosphatase (Martinez *et al.*, 2015),  
170 which is transcribed in a bicistronic transcript also encoding the cell cycle regulator AtCDC26  
171 (Lorenzo-Orts, Witthoef, *et al.*, 2019).

172         Since the polyP-synthesizing enzymes in higher eukaryotes remain to be identified, we set out  
173 to develop a genetically validated method that would allow for the specific detection of polyP stores in  
174 living cells. DAPI has been used to visualize polyP stores in various pro- and eukaryotic cells using a  
175 unique DAPI-polyP emission spectrum (Aschar-Sobbi *et al.*, 2008; Puchkov, 2010; Kulakova *et al.*,  
176 2011; Gomes *et al.*, 2013; Martin and Van Mooy, 2013). However, DAPI has recently been shown to  
177 also interact with inositol phosphates (Kolozsvari *et al.*, 2014) and many of the staining procedures  
178 lacked suitable genetic controls that would confirm the identity of the stained structures as *bona fide*  
179 polyP stores. We thus chose to heterologously express a bacterial polyP kinase PPK1 to induce specific  
180 polyP granules in *Nicotiana tabacum* and Arabidopsis cells (Figures 1,3). We found that expression of  
181 PPK1 but not of a catalytically inactive version of the enzyme led to stunted growth and anthocyanin  
182 accumulation in stable transgenic lines. This is possibly due to the accumulation of polyPs in the  
183 cytosol, which has been previously shown to have severe toxic effects in yeast (Gerasimaitė *et al.*,  
184 2014). As polyPs are very potent chelators of divalent cations, the presence of polyPs in the cytosol  
185 may inhibit the activity of many enzymatic processes and disrupt cellular structures. In line with this,  
186 we observe patchy expression of a PPK1-mCit but not the mPPK1-mCit fusion protein in the root tip of  
187 Arabidopsis (Figure 2).

188         The PPK1-generated polyP granules in Arabidopsis co-localize with the PPK1-mCit fusion  
189 protein itself and with the polyP-specific binding domain PPXc from *E. coli* (Figure 3). Importantly,  
190 these structures were specifically stained with the JC-D7 dye, previously shown to detect polyP  
191 granules in human cells (Angelova *et al.*, 2014). The same structures appear as electron dense granules  
192 in TEM analysis (Figure 4). Together, our experiments suggest that JC-D7 is a specific dye for polyP  
193 detection in plants. In line with this, JC-D7 stained the known, VTC-generated polyP stores in  
194 *Chlamydomonas* (Ruiz *et al.*, 2001; Aksoy *et al.*, 2014). However, we failed to reproducibly detect  
195 polyP granules in wild-type Arabidopsis, tobacco, maize, *Phaesolus vulgaris* or *Ricinus communis*  
196 plants (Figures. 3, S2-4), the latter of which contains the polyP-specific binding protein RcCHAD  
197 (Lorenzo-Orts, Hohmann, *et al.*, 2019). Also, we could not detect polyP accumulation in *ttn3-1* mutant,  
198 which we hypothesized to have reduced polyP phosphatase activity (Figures S2,S3) (Martinez *et al.*,

2015; Lorenzo-Orts, Witthoef, *et al.*, 2019). These findings suggest that either plants do not contain polyP stores, that they are present in concentrations too low to be detected by JC-D7, or that they do not accumulate in the tissues and/or growth conditions analyzed. In line with this, inositol polyphosphates including phytic acid (inositol hexakisphosphate) but not inorganic polyPs were detected by Raman spectroscopy in wheat grains (Kolozsvari *et al.*, 2015). However, our results are in stark contrast with earlier reports relying on biochemical extraction and hydrolysis methods (Miyachi, 1961; Tewari and Singh, 1964; DeMason and Stillman, 1986), which inadvertently may have detected inositol polyphosphates and/or other organic phosphates.

Taken together, we could demonstrate that indeed JC-D7 can specifically stain dense polyP granules in living and fixed plant and algal cells, but we failed to detect significant polyP stores in wild-type mono- or dicotyledonous plants. Of course, we cannot rule out the possibility that higher plants only accumulate polyP in specific organs or cells, only in certain developmental stages, or in response to certain environmental stimuli. The lack of significant polyP stores however raises the question, why conserved, broadly expressed polyP phosphatases exist in plants (Moeder *et al.*, 2013; Martinez *et al.*, 2015; Lorenzo-Orts, Witthoef, *et al.*, 2019) and why some species adopted polyP-specific binding proteins (Lorenzo-Orts, Hohmann, *et al.*, 2019). At this point, despite our efforts the statement by Harold (1966) remains true: “The case for the occurrence of polyP in higher plants and animals would be materially strengthened by the demonstration of appropriate biosynthetic enzymes” (Harold, 1966).

218

## 219 **Experimental procedures**

220

### 221 **Plant material and growth conditions**

222 Plants were grown at 21°C with 50 % humidity and a 16 h light : 8 h dark cycle. For confocal imaging, Arabidopsis seedlings were generally grown on vertical plates with half-strength Murashige and Skoog (<sup>1</sup>/<sub>2</sub>MS, Duchefa) media containing 1% (w/v) sucrose, 0.5 g/L MES buffer and 0.8 % (w/v) agar (Duchefa), pH 5.7 for 7 to 8 days. Seeds were sequentially surface-sterilized using 70 % (v/v) ethanol, a 5 % hypochlorite solution (Javel, 13 - 14 %), and rinsed 4 times with sterilized water.

227 The Arabidopsis *ttm3-1* (SALK\_133625) mutant was obtained from the European Arabidopsis Stock Center (<http://arabidopsis.info/>) (Lorenzo-Orts, Witthoef, *et al.*, 2019). *Chlamydomonas reinhardtii* strain WT 2C (mt<sup>+</sup>) cells were grown in tris-acetate phosphate medium (Kropat *et al.*, 2011), in white light originating from fluorescent tubes at 60 μM photons m<sup>-2</sup> s<sup>-1</sup> and at 25°C. The -sulfur medium was prepared by substituting sulfates by their corresponding chloride salts.

## 232 **Generation of Arabidopsis transgenic lines**

233 The coding sequences of *Escherichia coli* PPK1 (UniProt ID C3T032) and the mPPK1  
234 catalytically inactive mutant (H435A; H592A) were assembled together with a Ubi10 promoter and a  
235 C-terminal mCit tag and introduced into destination vector pH7m34GW2 and pB7m34GW2  
236 respectively as described (Lorenzo-Orts, Hohmann, *et al.*, 2019). The coding sequence of the C-  
237 terminal polyP binding domain of *Escherichia coli* exopolyphosphatase (PPXc, UniPro ID P0AFL6)  
238 was cloned into a pDONR221 vector using forward primer  
239 GGGGACAAGTTTGTACAAAAAAGCAGGCTTAATGCATCAGGATGTGCGTAGTCGC and  
240 reversed primer GGGGACCACTTTGTACAAGAAAGCTGGGTAAGTACTTTCTTCTTCAATTTTC.  
241 The PPXc domain was fused to a C-terminal mChe tag and expression was driven by a Ubi10  
242 promoter, assembled in destination vector pH7m34GW2. All of the constructs were transformed into *A.*  
243 *tumefaciens* strain pGV2260 by heat shock. All of transgenic lines were generated in Col-0 background  
244 using the floral dip method (Clough and Bent, 1998). T3 generation transformants were selected in  
245 <sup>1/2</sup>MS medium (Duchefa), supplement with 50 µg/mL BASTA or 20 µg/mL Hygromycin.

246

## 247 **Confocal imaging**

248 All light microscopy imaging was performed on a Zeiss LSM780 confocal microscope using a  
249 40 x / 1.3 water objective. Various confocal settings were set to record the emission of mCitrine  
250 (excitation 514 nm; emission 517-550 nm), mCherry (excitation 594 nm; emission 606-632nm), and  
251 JC-D7 (excitation 405 nm; emission 480-510 nm) using a GaAsP detector, and chlorophyll (excitation  
252 594 nm; emission 653-698 nm) was imaged with a PMT detector. The sequential scanning mode was  
253 used for imaging multiple-color images. JC-D7 (Angelova *et al.*, 2014) (Glix Laboratories Inc.) was  
254 applied at a concentration of 100 µM for 1.5 h at room temperature in HEPES buffered salt solution  
255 (HBSS) composed of 10 mM HEPES/NaOH (pH 7.4), 156 mM NaCl, 3 mM KCl, 2 mM MgSO<sub>4</sub>, 1.25  
256 mM KH<sub>2</sub>PO<sub>4</sub>, 2 mM CaCl<sub>2</sub>, 10 mM glucose, as described (Angelova *et al.*, 2014). 50 mM stock  
257 solution were prepared in 100% (v/v) DMSO. Live cell imaging was performed in root, hypocotyl, and  
258 leaf epidermis cells. Plant tissues or *C. reinhardtii* strain WT 2C (mt<sup>+</sup>) were incubated together with JC-  
259 D7 in HBSS buffer. To image fixed plant tissues, samples were fixed in vacuum in PBS buffer  
260 containing 4 % (v/v) para-formaldehyde, 0.1 % (v/v) Triton X-100 and 1 mM DTT (in the case of  
261 roots), then sequentially washed two times in PBS and two times in HBSS buffer.

262 To co-localize PPK1-induced polyP granules with PPXc-mChe and JC-D7, Arabidopsis lines  
263 harboring PPK1-mCit or PPK1m-mCit were crossed with plants expressing PPXc-mChe. F1 generation  
264 seeds were grown on <sup>1/2</sup>MS medium for 8-9 d and then stained by JC-D7 as described above. To co-



265 localize transiently expressed PPK1-mCit and PPK1m-mCit with JC-D7, *A. tumefaciens* cell cultures  
266 were infiltrated into *Nicotiana benthamiana* leaves as described (Lorenzo-Orts, Hohmann, *et al.*, 2019).  
267 Epidermal cells were imaged by confocal microscopy after 3 d incubation at room temperature.

268

### 269 **Transmission electron microscope (TEM) imaging**

270 Samples for TEM were fixed overnight at 4 °C in 2.5% (v/v) glutaraldehyde, 0.01% (v/v)  
271 Tween-20 in 100 mM sodium cacodylate pH 7.0, after vacuum infiltration. A first post-fixation was  
272 done in 1.5 % (w/v) osmium tetroxide for 2 h at 4 °C, and a second post-fixation in 1 % (w/v) uranyl  
273 acetate for 1 h at 4 °C. Seedlings were then embedded in 1.5 % (w/v) agarose, dehydrated in a graded  
274 ethanol series and finally embedded in Epon 812. 85 nm ultra-thin sections were made using a UCT  
275 microtome (Leica) and deposited on Formvar films on copper grids; they were stained for 25 min with  
276 2 % (w/v) uranyl acetate, then for 20 min with Reynolds lead citrate, and finally observed with a Tecnai  
277 G2 Sphera (FEI) at 120kV equipped with a high-resolution digital camera.

278

### 279 **Plant protein extraction for western blot**

280 Around 250 mg plant tissue was harvested from the shoots of 4 week old plants, frozen in liquid  
281 N<sub>2</sub> in 2 ml eppendorf tubes with metal beads, and ground in a tissue lyzer (MM400, Retsch). Ground  
282 plant material was resuspended in 500 µl extraction buffer (150 mM NaCl, 50 mM Tris-HCl pH 7.5, 10  
283 % [v/v] glycerol, 1 % [v/v] Triton X-100, 5 mM DTT) containing a protease inhibitor cocktail (P9599,  
284 Sigma, 1 tablet / 20 ml) and centrifuged for 30 min and 1700 x g at 4°C. Protein concentrations were  
285 estimated in Bradford protein assays. Around 100 µg protein was mixed with 2x SDS loading buffer,  
286 boiled at 95 °C for 10 min, and separated on 8 % SDS-PAGE gels. Anti-GFP antibody coupled with  
287 horse radish peroxidase (HRP, Miltenyi Biotec) at 1:2000 dilution was used to detect eGFP/mCit  
288 tagged protein constructs.

289

### 290 **Structural diagrams**

291 for the crystals structures of *E. coli* PPK1 (<http://rcsb.org> PDB-ID 1XDO) (Zhu *et al.*, 2005)  
292 and PPX (PDB-ID 1U6Z) (Alvarado *et al.*, 2006) were prepared using Pymol  
293 (<https://sourceforge.net/projects/pymol/>).

294

### 295 **Acknowledgments**

296 The *Chlamydomonas* WT 2C (mt<sup>+</sup>) strain was kindly provided by Michel Goldschmidt-  
297 Clermont, Department of Botany and Plant Biology, University of Geneva. We thank Michel

298 Goldschmidt-Clermont and Chloe Laligne for help with Chlamydomonas cell culture and Yvon Jaillais,  
299 Daniel Couto and Michel Goldschmidt-Clermont for critical reading of the manuscript. This work was  
300 supported by an ERC starting grant from the European Research Council under the European Union's  
301 Seventh Framework Programme (FP/2007-2013) / ERC Grant Agreement n. 310856 and the Howard  
302 Hughes Medical Institute International Research Scholar Award, both to M.H..

303

#### 304 **Figure legends**

#### 305 **Figure1. Heterologous expression of *E. coli* PPK1 results in dose-dependent stunted growth in** 306 ***Arabidosis*.**

307 (a) Structural view of the PPK active site. PPK1 is show in blue (PDB-ID 1XDO, ribbon diagram) with  
308 the catalytic His435 and His592 (in bonds representation, in yellow) contacting the  $\gamma$  and  $\beta$  phosphates  
309 of the ATP substrate (in bonds representation). (b) Growth phenotype of PPK1 and mPPK1 expressing  
310 plants. Shown are rosettes of 4 week old plants (upper panel) and 5 week old flowering plants (lower  
311 panel). Three independent lines are shown for each PPK1-mCit or mPPK1-mCit. (c) Western blot of  
312 the lines shown in (b, lower panel), using an anti-GFP antibody.

313

#### 314 **Figure 2. PPK1-mCit but not mPPK1-mCit expression results in the formation of punctate** 315 **structures surrounded by the enzyme.**

316 Confocal imaging of root tips of 7 DAG seedlings grown on  $^{1/2}$ MS plates. Col-0, PPK1-mCit and  
317 mPPK1-mCit expressed seedlings were imaged with similar confocal settings. Enlarged squares  
318 highlight the presence of dense punctate structures (highlighted by arrow heads) in PPK1 but not  
319 mPPK1 expressing lines. Scale bar = 20  $\mu$ m.

320

#### 321 **Figure 3. JC-D7 and PPXc mark polyP granules in PPK1-mCit but not mPPK1-mCit expressing** 322 **plants.**

323 (a) Transiently expressed PPK1-mCit (green) co-localizes with JC-D7 (magenta) stained polyP  
324 granules outside chloroplasts (blue) in tobacco epidermal cells. White arrow heads highlight the  
325 granule structures, and black arrow heads indicate putative nuclear structures.

326 (b) Overview of the PPX polyP binding domain PPXc (PDB-ID 1U6Z, residues 311-508, ribbon  
327 diagram, in magenta) bound to sulfate ions which mimic the position of the polyP substrate (Alvarado  
328 *et al.*, 2006) (in bonds representation).

329 (c) Sub-cellular localization of mChe tagged PPXc (magenta) expressed in isolation in *Nicotiana*  
330 *tabacum* epidermal cells and Arabidopsis hypocotyl cells. Arrow heads indicate putative nuclear  
331 structures.

332 (d) Arabidopsis lines that stably express PPXc-mChe were crossed with lines that stably express PPK1-  
333 mCit and mPPK1-mCit. Active PPK1-mCit (green, upper panel) but not its catalytic impaired mutant  
334 version (green, lower panel) co-localizes with PPXc-mChe (magenta) on JC-D7 (cyan) stained polyP  
335 granules. Scale bars = 10  $\mu\text{m}$ .

336

337 **Figure 4. Electron dense granules are present in TEM sections of PPK1-mCit but not mPPK1-**  
338 **mCit expressing plants.**

339 Hypocotyl sections (upper panel, scale bar = 50  $\mu\text{m}$ ) together with a zoomed in view on xylem cells  
340 (lower panel, scale bar = 5  $\mu\text{m}$ ) of PPK1-mCit and mPPK1-mCit expressing Arabidopsis lines. Arrow  
341 heads highlight electron dense granules.

342

343 **Figure 5. JC-D7 can specifically stain polyP granules in *Chlamydomonas reinhardtii*.**

344 JC-D7 (green) stained polyP granules in *Chlamydomonas* cells grown in tris-acetate phosphate  
345 medium. The -sulfur medium was prepared by substituting sulfates by their corresponding chloride  
346 salts. Chlorophyll auto-fluorescence is shown in magenta. Scale bars = 10  $\mu\text{m}$ .

347

348 **Figure S1. PolyP granules can be detected in fixed Arabidopsis cells expressing PPK1-mCit.**

349 Arabidopsis seeds from PPXc-mChe / PPK1-mCit (upper panel) or PPXc-mChe / mPPK1-mCit (lower  
350 panel) double transgenic lines were germinated on <sup>1/2</sup>MS medium. 9 d old seedlings were fixed by para-  
351 formaldehyde and subsequently stained with JC-D7. Arrow heads highlight structures where PPXc-  
352 mChe (magenta) and active PPK1-mCit (green) co-localize with JC-D7 (cyan) stained polyP granules  
353 in leaf and hypocotyl cells. No co-localization or JC-D7 staining was observed in mPPK1-mCit  
354 expressing control lines. Scale bars = 10  $\mu\text{m}$ .

355

356 **Figure S2. JC-D7 fails to stain specific structures in hypocotyl cells of Col-0 and *ttn3-1* plants.**

357 9 d old Col-0 and *ttn1-3* seedlings grown on <sup>1/2</sup>MS plates were stained by JC-D7 and imaged by  
358 confocal scanning microscopy, the PPK1-mCit line is shown as a control alongside. White arrow heads  
359 show PPK1-mCit (green) and JC-D7 (magenta) stained polyP granules in PPK1-mCit expressed  
360 hypocotyl cells, no specific JC-D7 staining was observed in Col-0 or *ttn3-1* hypocotyl cells. Scale bars  
361 = 20  $\mu\text{m}$ .

362 **Figure S3. JC-D7 fails to stain specific structures in fixed hypocotyl cells of Col-0 and *ttm3-1***  
363 **plants.**

364 Samples were grown and imaged as described in Figure S2, using a fixation protocol specified in  
365 Experimental Procedures. Scale bars = 20  $\mu\text{m}$ .

366

367 **Figure S4. No JC-D7 stained polyP granules could be detected in epidermal cells of mono- and**  
368 **dicotyledonous plants.**

369 Epidermal cells from *Zea mais*, *Phaseolus vulgaris* and *Ricinus communis* were stained using the JC-  
370 D7 dye. No specific polyP signal was detected by confocal scanning microscopy.

371

372 **References**

**Ahn, K. and Kornberg, A.** (1990) Polyphosphate kinase from *Escherichia coli*. Purification and demonstration of a phosphoenzyme intermediate. *J. Biol. Chem.*, **265**, 11734–11739.

**Akiyama, M., Crooke, E. and Kornberg, A.** (1993) An exopolyphosphatase of *Escherichia coli*. The enzyme and its *ppx* gene in a polyphosphate operon. *J. Biol. Chem.*, **268**, 633–639.

**Aksoy, M., Pootakham, W. and Grossman, A.R.** (2014) Critical function of a *Chlamydomonas reinhardtii* putative polyphosphate polymerase subunit during nutrient deprivation. *Plant Cell*, **26**, 4214–4229.

**Alvarado, J., Ghosh, A., Janovitz, T., Jauregui, A., Hasson, M.S. and Sanders, D.A.** (2006) Origin of exopolyphosphatase processivity: Fusion of an ASKHA phosphotransferase and a cyclic nucleotide phosphodiesterase homolog. *Structure*, **14**, 1263–1272.

**Angelova, P.R., Agrawalla, B.K., Elustondo, P.A., Gordon, J., Shiba, T., Abramov, A.Y., Chang, Y.-T. and Pavlov, E.V.** (2014) In situ investigation of mammalian inorganic polyphosphate localization using novel selective fluorescent probes JC-D7 and JC-D8. *ACS Chem. Biol.*, **9**, 2101–2110.

**Aschar-Sobbi, R., Abramov, A.Y., Diao, C., Kargacin, M.E., Kargacin, G.J., French, R.J. and Pavlov, E.** (2008) High Sensitivity, Quantitative Measurements of Polyphosphate Using a New DAPI-Based Approach. *J Fluoresc.*, **18**, 859–866.

**Ault-Riché, D. and Kornberg, A.** (1999) Definitive enzymatic assays in polyphosphate analysis. *Prog. Mol. Subcell. Biol.*, **23**, 241–252.

**Babes, V.** (1895) Beobachtungen über die metachromatischen Körperchen, Sporenbildung, Verzweigung, Kolben-und Kapselbildung pathogener Bakterien. *Zeitschr. f. Hygiene.*, **20**, 412–437.

**Bru, S., Jiménez, J., Canadell, D., Ariño, J. and Clotet, J.** (2016) Improvement of biochemical methods of polyP quantification. *Microb Cell*, **4**, 6–15.

- Clark, J.E. and Wood, H.G.** (1987) Preparation of standards and determination of sizes of long-chain polyphosphates by gel electrophoresis. *Analytical Biochemistry*, **161**, 280–290.
- Clough, S.J. and Bent, A.F.** (1998) Floral dip: a simplified method for *Agrobacterium*-mediated transformation of *Arabidopsis thaliana*. *Plant J.*, **16**, 735–743.
- DeMason, D.A. and Stillman, J.I.** (1986) Identification of phosphate granules occurring in seedling tissue of two palm species (*Phoenix dactylifera* and *Washingtonia filifera*). *Planta*, **167**, 321–329.
- Docampo, R. and Huang, G.** (2016) Acidocalcisomes of Eukaryotes. *Curr Opin Cell Biol*, **41**, 66–72.
- Fang, J., Rohloff, P., Miranda, K. and Docampo, R.** (2007) Ablation of a small transmembrane protein of *Trypanosoma brucei* (TbVTC1) involved in the synthesis of polyphosphate alters acidocalcisome biogenesis and function, and leads to a cytokinesis defect. *Biochem. J.*, **407**, 161–170.
- Gal, A., Sorrentino, A., Kahil, K., Pereiro, E., Faivre, D. and Scheffel, A.** (2018) Native-state imaging of calcifying and noncalcifying microalgae reveals similarities in their calcium storage organelles. *Proc. Natl. Acad. Sci. U.S.A.*, **115**, 11000–11005.
- Gerasimaitė, R., Sharma, S., Desfougères, Y., Schmidt, A. and Mayer, A.** (2014) Coupled synthesis and translocation restrains polyphosphate to acidocalcisome-like vacuoles and prevents its toxicity. *J Cell Sci*, **127**, 5093–5104.
- Gomes, F.M., Ramos, I.B., Wendt, C., Girard-Dias, W., De Souza, W., Machado, E.A. and Miranda, K.** (2013) New insights into the in situ microscopic visualization and quantification of inorganic polyphosphate stores by 4',6-diamidino-2-phenylindole (DAPI)-staining. *Eur J Histochem*, **57**, e34.
- Gómez-García, M.R. and Kornberg, A.** (2004) Formation of an actin-like filament concurrent with the enzymatic synthesis of inorganic polyphosphate. *Proc. Natl. Acad. Sci. U.S.A.*, **101**, 15876–15880.
- Harold, F.M.** (1966) Inorganic polyphosphates in biology: structure, metabolism, and function. *Bacteriol Rev*, **30**, 772–794.
- Hooley, P., Whitehead, M.P. and Brown, M.R.W.** (2008) Eukaryote polyphosphate kinases: is the “Kornberg” complex ubiquitous? *Trends Biochem. Sci*, **33**, 577–582.
- Hothorn, M., Neumann, H., Lenherr, E.D., et al.** (2009) Catalytic core of a membrane-associated eukaryotic polyphosphate polymerase. *Science*, **324**, 513–516.
- Jimenez-Nuñez, M.D., Moreno-Sanchez, D., Hernandez-Ruiz, L., Benítez-Rondán, A., Ramos-Amaya, A., Rodríguez-Bayona, B., Medina, F., Brieva, J.A. and Ruiz, F.A.** (2012) Myeloma cells contain high levels of inorganic polyphosphate which is associated with nucleolar transcription. *Haematologica*, **97**, 1264–1271.
- Keck, K. and Stich, H.** (1957) The Widespread Occurrence of Polyphosphate in Lower Plants. *Ann Bot*, **21**, 611–619.

- Kolozsvari, B., Firth, S. and Saiardi, A.** (2015) Raman Spectroscopy Detection of Phytic Acid in Plant Seeds Reveals the Absence of Inorganic Polyphosphate. *Molecular Plant*, **8**, 826–828.
- Kolozsvari, B., Parisi, F. and Saiardi, A.** (2014) Inositol phosphates induce DAPI fluorescence shift. *Biochem. J.*, **460**, 377–385.
- Kornberg, A., Rao, N.N. and Ault-Riché, D.** (1999) Inorganic polyphosphate: a molecule of many functions. *Annu. Rev. Biochem.*, **68**, 89–125.
- Kornberg, S.R.** (1957) Adenosine triphosphate synthesis from polyphosphate by an enzyme from *Escherichia coli*. *Biochim. Biophys. Acta*, **26**, 294–300.
- Kornberg, S.R.** (1956) Tripolyphosphate and trimetaphosphate in yeast extracts. *J. Biol. Chem.*, **218**, 23–31.
- Kornberg, S.R., Lehman, I.R., Bessman, M.J., et al.** (1957) Enzymatic cleavage of deoxyguanosine triphosphate to deoxyguanosine and tripolyphosphate. *J. Biol. Chem.*, **233**, 159–162.
- Kropat, J., Hong-Hermesdorf, A., Casero, D., Ent, P., Castruita, M., Pellegrini, M., Merchant, S.S. and Malasarn, D.** (2011) A revised mineral nutrient supplement increases biomass and growth rate in *Chlamydomonas reinhardtii*. *Plant J.*, **66**, 770–780.
- Kulaev, I.S.** (2005) The Occurrence of Polyphosphates in Living Organisms. In *The Biochemistry of Inorganic Polyphosphates*. John Wiley & Sons, Ltd, pp. 37–44. Available at: <https://onlinelibrary.wiley.com/doi/abs/10.1002/0470858192.ch3> [Accessed April 16, 2019].
- Kulaev, I.S. and Vagabov, V.M.** (1983) Polyphosphate metabolism in micro-organisms. *Adv. Microb. Physiol.*, **24**, 83–171.
- Kulakova, A.N., Hobbs, D., Smithen, M., Pavlov, E., Gilbert, J.A., Quinn, J.P. and McGrath, J.W.** (2011) Direct Quantification of Inorganic Polyphosphate in Microbial Cells Using 4'-6-Diamidino-2-Phenylindole (DAPI). *Environ. Sci. Technol.*, **45**, 7799–7803.
- Kumble, K.D., Ahn, K. and Kornberg, A.** (1996) Phosphohistidyl active sites in polyphosphate kinase of *Escherichia coli*. *Proc. Natl. Acad. Sci. U.S.A.*, **93**, 14391–14395.
- Kumble, K.D. and Kornberg, A.** (1995) Inorganic polyphosphate in mammalian cells and tissues. *J. Biol. Chem.*, **270**, 5818–5822.
- Lorenzo-Orts, L., Hohmann, U., Zhu, J. and Hothorn, M.** (2019) Molecular characterization of CHAD domains as inorganic polyphosphate binding modules. *bioRxiv*, 567040.
- Lorenzo-Orts, L., Witthoef, J., Deforges, J., et al.** (2019) Concerted expression of a cell cycle regulator and a metabolic enzyme from a bicistronic transcript in plants. *Nature Plants*, **5**, 184–193.
- Macfarlane, M.G.** (1936) Phosphorylation in living yeast. *Biochem J.*, **30**, 1369–1379.
- Mamun, E.A., Cantrill, L.C., Overall, R.L. and Sutton, B.G.** (2005) Cellular organisation in meiotic and early post-meiotic rice anthers. *Cell Biol. Int.*, **29**, 903–913.

- Martin, P. and Van Mooy, B.A.S.** (2013) Fluorometric Quantification of Polyphosphate in Environmental Plankton Samples: Extraction Protocols, Matrix Effects, and Nucleic Acid Interference. *Appl Environ Microbiol*, **79**, 273–281.
- Martinez, J., Truffault, V. and Hothorn, M.** (2015) Structural Determinants for Substrate Binding and Catalysis in Triphosphate Tunnel Metalloenzymes. *J. Biol. Chem.*, **290**, 23348–60.
- Meyer, A.** (1904) Orientierende Untersuchung über Verbreitung, Morphologie, und Chemie des Volutins. *Bot Z*, **62**, 113–152.
- Miyachi, S.** (1961) Inorganic Polyphosphate in Spinach Leaves. *J Biochem (Tokyo)*, **50**, 367–371.
- Moeder, W., Garcia-Petit, C., Ung, H., Fucile, G., Samuel, M.A., Christendat, D. and Yoshioka, K.** (2013) Crystal structure and biochemical analyses reveal that the Arabidopsis triphosphate tunnel metalloenzyme AtTTM3 is a tripolyphosphatase involved in root development. *Plant J.*, **76**, 615–626.
- Moreno, B., Urbina, J.A., Oldfield, E., Bailey, B.N. and Docampo, R.** (2000) <sup>31</sup>P NMR Spectroscopy of Trypanosoma brucei, Trypanosoma cruzi, and Leishmania major EVIDENCE FOR HIGH LEVELS OF CONDENSED INORGANIC PHOSPHATES. *J. Biol. Chem.*, **275**, 28356–28362.
- Moreno-Sanchez, D., Hernandez-Ruiz, L., Ruiz, F.A. and Docampo, R.** (2012) Polyphosphate is a novel pro-inflammatory regulator of mast cells and is located in acidocalcisomes. *J. Biol. Chem.*, **287**, 28435–28444.
- Ogawa, N., DeRisi, J. and Brown, P.O.** (2000) New components of a system for phosphate accumulation and polyphosphate metabolism in Saccharomyces cerevisiae revealed by genomic expression analysis. *Mol. Biol. Cell*, **11**, 4309–4321.
- Pisoni, R.L. and Lindley, E.R.** (1992) Incorporation of [<sup>32</sup>P]orthophosphate into long chains of inorganic polyphosphate within lysosomes of human fibroblasts. *J. Biol. Chem.*, **267**, 3626–3631.
- Puchkov, E.O.** (2010) Brownian motion of polyphosphate complexes in yeast vacuoles: characterization by fluorescence microscopy with image analysis. *Yeast*, **27**, 309–315.
- Rao, N.N., Gómez-García, M.R. and Kornberg, A.** (2009) Inorganic Polyphosphate: Essential for Growth and Survival. *Annual Review of Biochemistry*, **78**, 605–647.
- Ruiz, F.A., Lea, C.R., Oldfield, E. and Docampo, R.** (2004) Human platelet dense granules contain polyphosphate and are similar to acidocalcisomes of bacteria and unicellular eukaryotes. *J. Biol. Chem.*, **279**, 44250–44257.
- Ruiz, F.A., Marchesini, N., Seufferheld, M., Govindjee, null and Docampo, R.** (2001) The polyphosphate bodies of Chlamydomonas reinhardtii possess a proton-pumping pyrophosphatase and are similar to acidocalcisomes. *J. Biol. Chem.*, **276**, 46196–46203.
- Saito, K., Ohtomo, R., Kuga-Uetake, Y., Aono, T. and Saito, M.** (2005) Direct labeling of polyphosphate at the ultrastructural level in Saccharomyces cerevisiae by using the affinity of

the polyphosphate binding domain of *Escherichia coli* exopolyphosphatase. *Appl. Environ. Microbiol.*, **71**, 5692–5701.

**Seufferheld, M., Vieira, M.C.F., Ruiz, F.A., Rodrigues, C.O., Moreno, S.N.J. and Docampo, R.** (2003) Identification of organelles in bacteria similar to acidocalcisomes of unicellular eukaryotes. *J. Biol. Chem.*, **278**, 29971–29978.

**Smith, S.A. and Morrissey, J.H.** (2007) Sensitive fluorescence detection of polyphosphate in polyacrylamide gels using 4',6-diamidino-2-phenylindol. *Electrophoresis*, **28**, 3461–3465.

**Tewari, K.K. and Singh, M.** (1964) Acid soluble and acid insoluble inorganic polyphosphates in *Cuscuta reflexa*. *Phytochemistry*, **3**, 341–347.

**Tumlirsch, T. and Jendrossek, D.** (2017) Proteins with CHAD Domains (Conserved Histidine  $\alpha$ -Helical Domain) Are Attached to Polyphosphate (polyP) Granules in vivo and Constitute a Novel Family of PolyP-Associated Proteins (Phosins). *Appl. Environ. Microbiol.*, pii: e03399-1.

**Ung, H., Karia, P., Ebine, K., Ueda, T., Yoshioka, K. and Moeder, W.** (2017) Triphosphate Tunnel Metalloenzyme Function in Senescence Highlights a Biological Diversification of This Protein Superfamily. *Plant Physiol.*, **175**, 473–485.

**Urech, K., Dürr, M., Boller, T., Wiemken, A. and Schwencke, J.** (1978) Localization of polyphosphate in vacuoles of *Saccharomyces cerevisiae*. *Arch. Microbiol.*, **116**, 275–278.

**Werner, T.P., Amrhein, N. and Freimoser, F.M.** (2007a) Inorganic polyphosphate occurs in the cell wall of *Chlamydomonas reinhardtii* and accumulates during cytokinesis. *BMC Plant Biol.*, **7**, 51.

**Werner, T.P., Amrhein, N. and Freimoser, F.M.** (2007b) Specific localization of inorganic polyphosphate (poly P) in fungal cell walls by selective extraction and immunohistochemistry. *Fungal Genetics and Biology*, **44**, 845–852.

**Widra, A.** (1959) METACHROMATIC GRANULES OF MICROORGANISMS<sup>1</sup>. *J. Bacteriol*, **78**, 664–670.

**Wild, R., Gerasimaite, R., Jung, J.-Y., et al.** (2016) Control of eukaryotic phosphate homeostasis by inositol polyphosphate sensor domains. *Science*, **352**, 986–90.

**Wurst, H. and Kornberg, A.** (1994) A soluble exopolyphosphatase of *Saccharomyces cerevisiae*. Purification and characterization. *J. Biol. Chem.*, **269**, 10996–11001.

**Zhang, H., Gómez-García, M.R., Brown, M.R.W. and Kornberg, A.** (2005) Inorganic polyphosphate in *Dictyostelium discoideum*: influence on development, sporulation, and predation. *Proc. Natl. Acad. Sci. U.S.A.*, **102**, 2731–2735.

**Zhang, H., Ishige, K. and Kornberg, A.** (2002) A polyphosphate kinase (PPK2) widely conserved in bacteria. *Proc. Natl. Acad. Sci. U.S.A.*, **99**, 16678–16683.

**Zhu, J., Lau, K., Harmel, R.K., et al.** (2018) Two bifunctional inositol pyrophosphate kinases/phosphatases control plant phosphate homeostasis. *bioRxiv*, 467076.



**Zhu, Y., Huang, W., Lee, S.S.K. and Xu, W.** (2005) Crystal structure of a polyphosphate kinase and its implications for polyphosphate synthesis. *EMBO Rep*, **6**, 681–687.

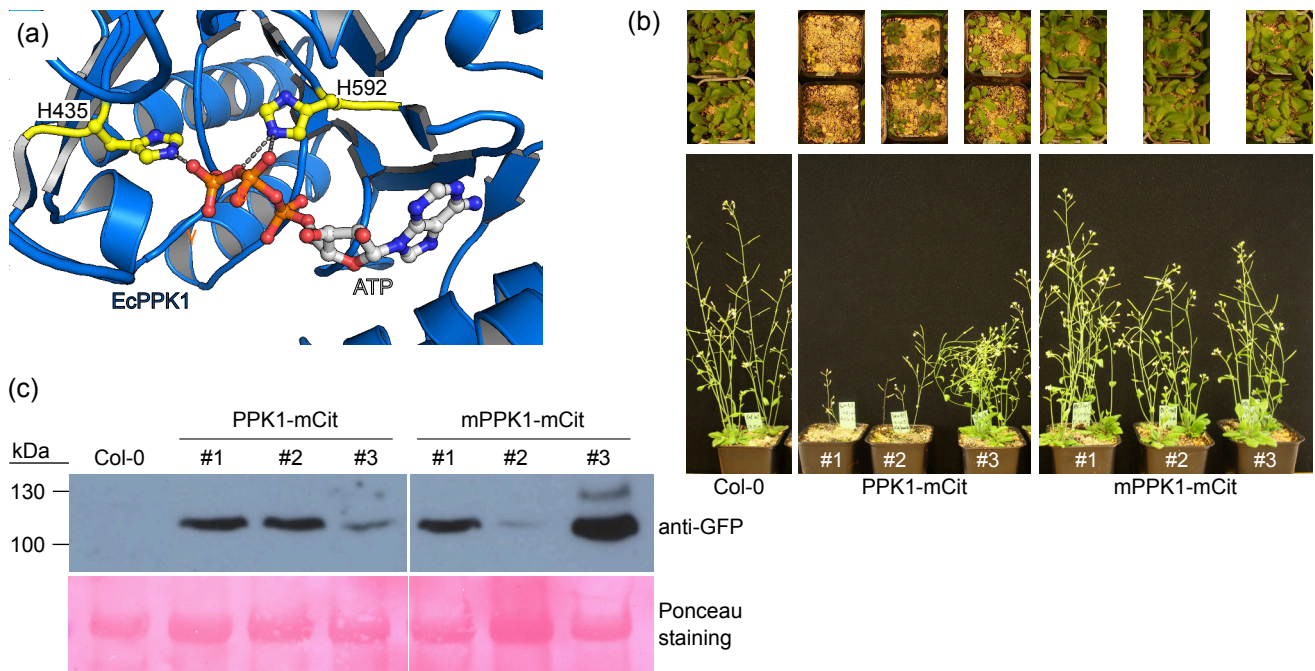

**Figure1. Heterologous expression of *E. coli* PPK1 results in dose-dependent stunted growth in Arabidopsis.**

(a) Structural view of the PPK active site. PPK1 is shown in blue (PDB-ID 1XDO, ribbon diagram) with the catalytic His435 and His592 (in bonds representation, in yellow) contacting the  $\gamma$  and  $\beta$  phosphates of the ATP substrate (in bonds representation). (b) Growth phenotype of PPK1 and mPPK1 expressing plants. Shown are rosettes of 4 week old plants (upper panel) and 5 week old flowering plants (lower panel). Three independent lines are shown for each PPK1-mCit or mPPK1-mCit. (c) Western blot of the lines shown in (b, lower panel), using an anti-GFP antibody.

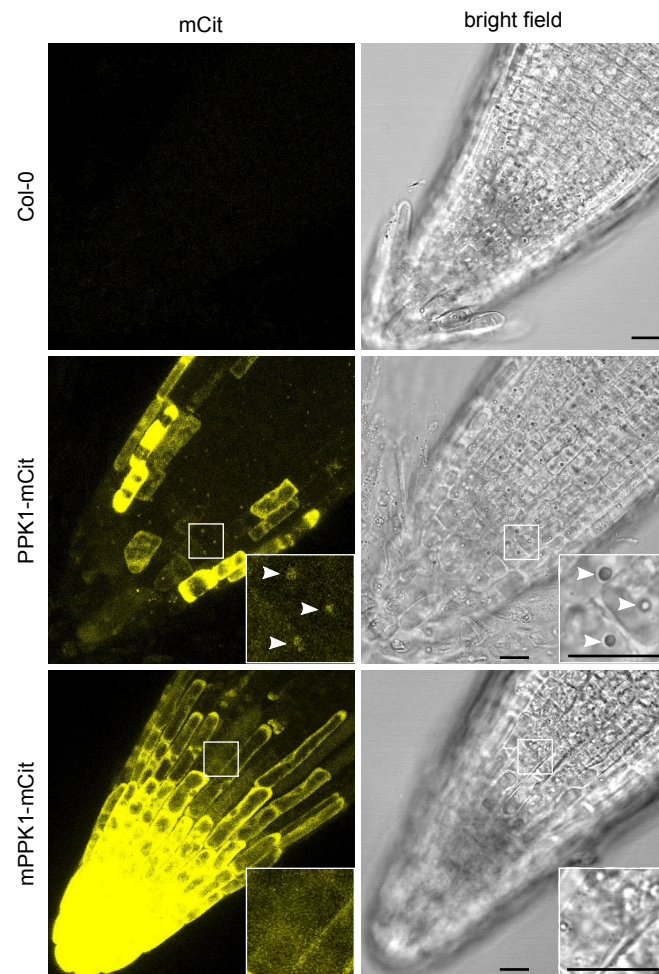

**Figure 2. PPK1-mCit but not mPPK1-mCit expression results in the formation of punctate structures surrounded by the enzyme.**

Confocal imaging of root tips of 7 DAG seedlings grown on  $^{12}\text{C}$ MS plates. Col-0, PPK1-mCit and mPPK1-mCit expressed seedlings were imaged with similar confocal settings. Enlarged squares highlight the presence of dense punctate structures (highlighted by arrow heads) in PPK1 but not mPPK1 expressing lines. Scale bar = 20  $\mu\text{m}$ .

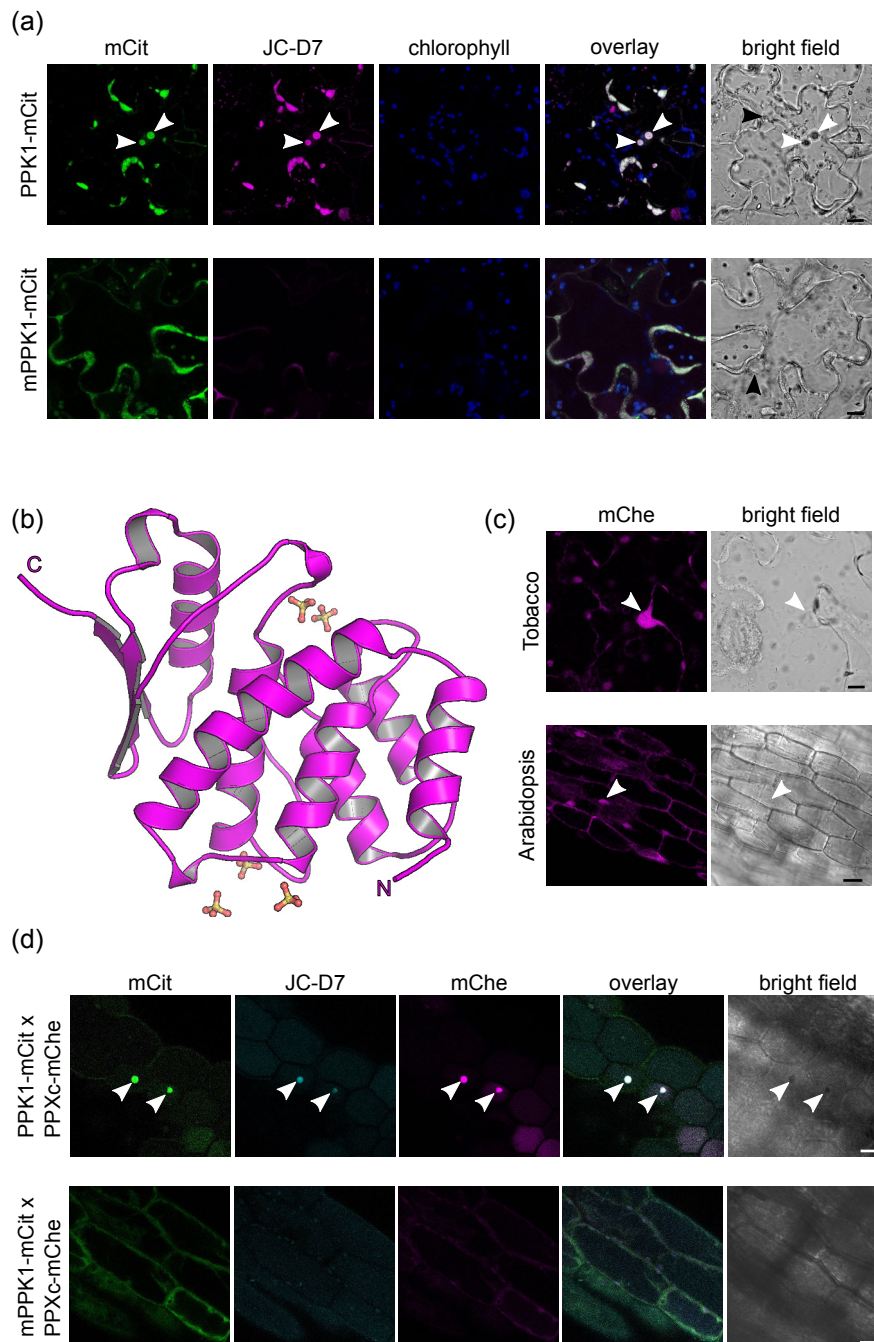

**Figure 3. JC-D7 and PPXc mark polyP granules in PPK1-mCit but not mPPK1-mCit expressing plants.**

(a) Transiently expressed PPK1-mCit (green) co-localizes with JC-D7 (magenta) stained polyP granules outside chloroplasts (blue) in tobacco epidermal cells. White arrow heads highlight the granule structures, and black arrow heads indicate putative nuclear structures.

(b) Overview of the PPX polyP binding domain PPXc (PDB-ID 1U6Z, residues 311-508, ribbon diagram, in magenta) bound to sulfate ions which mimic the position of the polyP substrate (Alvarado *et al.*, 2006) (in bonds representation).

(c) Sub-cellular localization of mChe tagged PPXc (magenta) expressed in isolation in *Nicotiana tabacum* epidermal cells and Arabidopsis hypocotyl cells. Arrow heads indicate putative nuclear structures.

(d) Arabidopsis lines that stably express PPXc-mChe were crossed with lines that stably express PPK1-mCit and mPPK1-mCit. Active PPK1-mCit (green, upper panel) but not its catalytic impaired mutant version (green, lower panel) co-localizes with PPXc-mChe (magenta) on JC-D7 (cyan) stained polyP granules. Scale bars = 10  $\mu$ m.

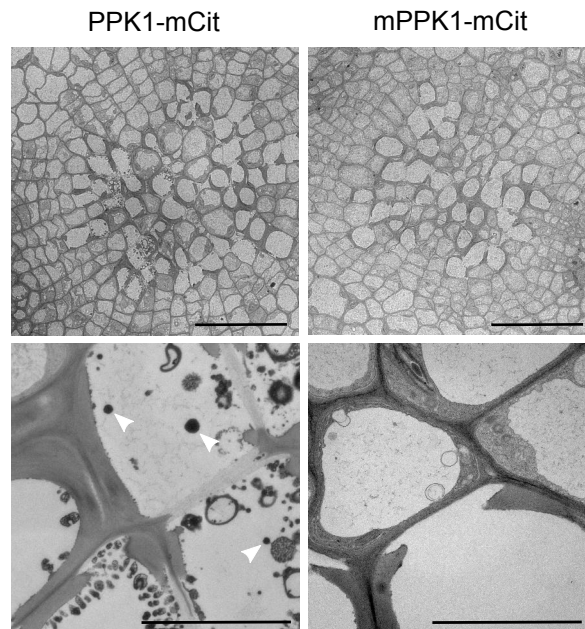

**Figure 4. Electron dense granules are present in TEM sections of PPK1-mCit but not mPPK1-mCit expressing plants.** Hypocotyl sections (upper panel, scale bar = 50 μm) together with a zoomed in view on xylem cells (lower panel, scale bar = 5 μm) of PPK1-mCit and mPPK1-mCit expressing Arabidopsis lines. Arrow heads highlight electron dense granules.

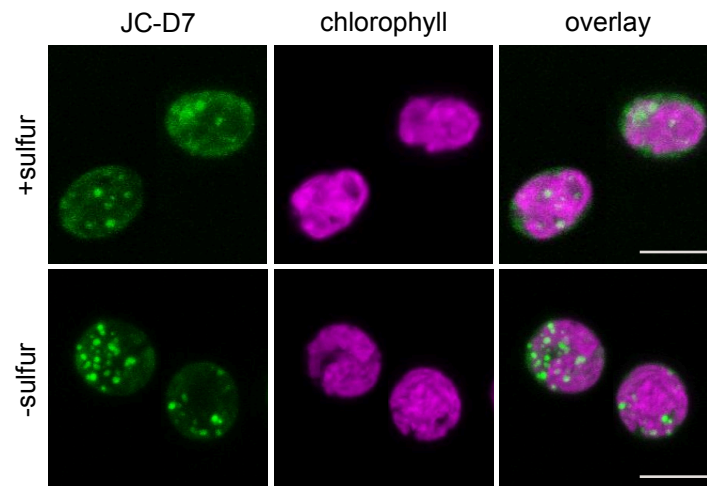

**Figure 5. JC-D7 can specifically stain polyP granules in *Chlamydomonas reinhardtii*.**

JC-D7 (green) stained polyP granules in *Chlamydomonas* cells grown in tris-acetate phosphate medium. The -sulfur medium was prepared by substituting sulfates by their corresponding chloride salts. Chlorophyll auto-fluorescence is shown in magenta. Scale bars = 10  $\mu$ m.

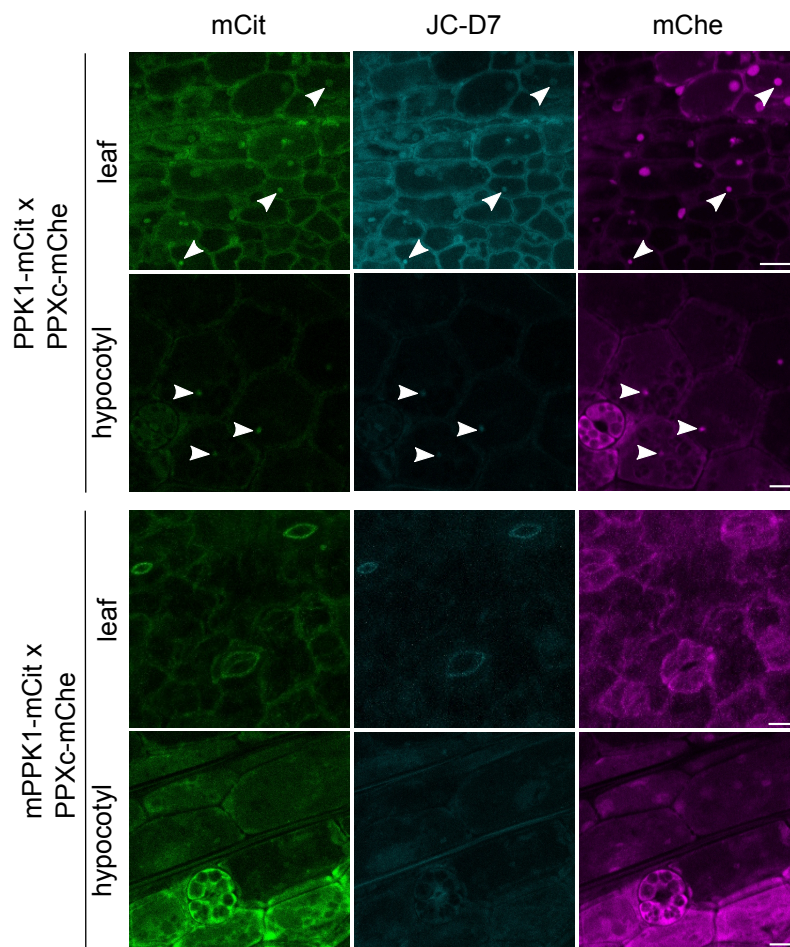

**Figure S1. PolyP granules can be detected in fixed Arabidopsis cells expressing PPK1-mCit.**

Arabidopsis seeds from PPXc-mChe / PPK1-mCit (upper panel) or PPXc-mChe / mPPK1-mCit (lower panel) double transgenic lines were germinated on  $^{1/2}$ MS medium. 9 d old seedlings were fixed by para-formaldehyde and subsequently stained with JC-D7. Arrow heads highlight structures where PPXc-mChe (magenta) and active PPK1-mCit (green) co-localize with JC-D7 (cyan) stained polyP granules in leaf and hypocotyl cells. No co-localization or JC-D7 staining was observed in mPPK1-mCit expressing control lines. Scale bars = 10  $\mu$ m.

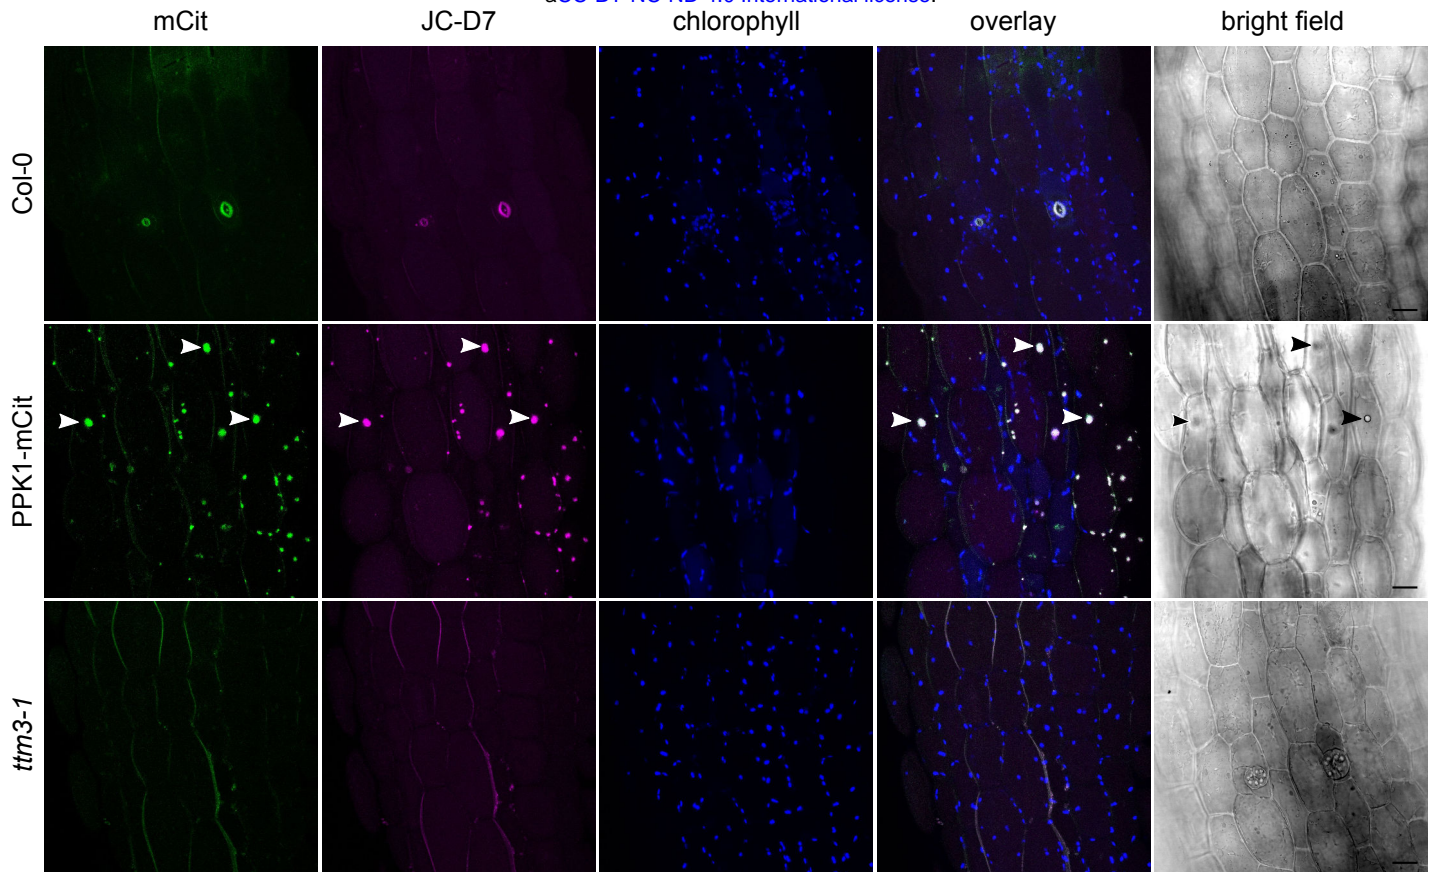

**Figure S2. JC-D7 fails to stain specific structures in hypocotyl cells of Col-0 and *ttm3-1* plants.**

9 d old Col-0 and *ttm3-1* seedlings grown on  $^{12}\text{C}$ MS plates were stained by JC-D7 and imaged by confocal scanning microscopy, the PPK1-mCit line is shown as a control alongside. White arrow heads show PPK1-mCit (green) and JC-D7 (magenta) stained polyP granules in PPK1-mCit expressed hypocotyl cells, no specific JC-D7 staining was observed in Col-0 or *ttm3-1* hypocotyl cells. Scale bars = 20  $\mu\text{m}$ .



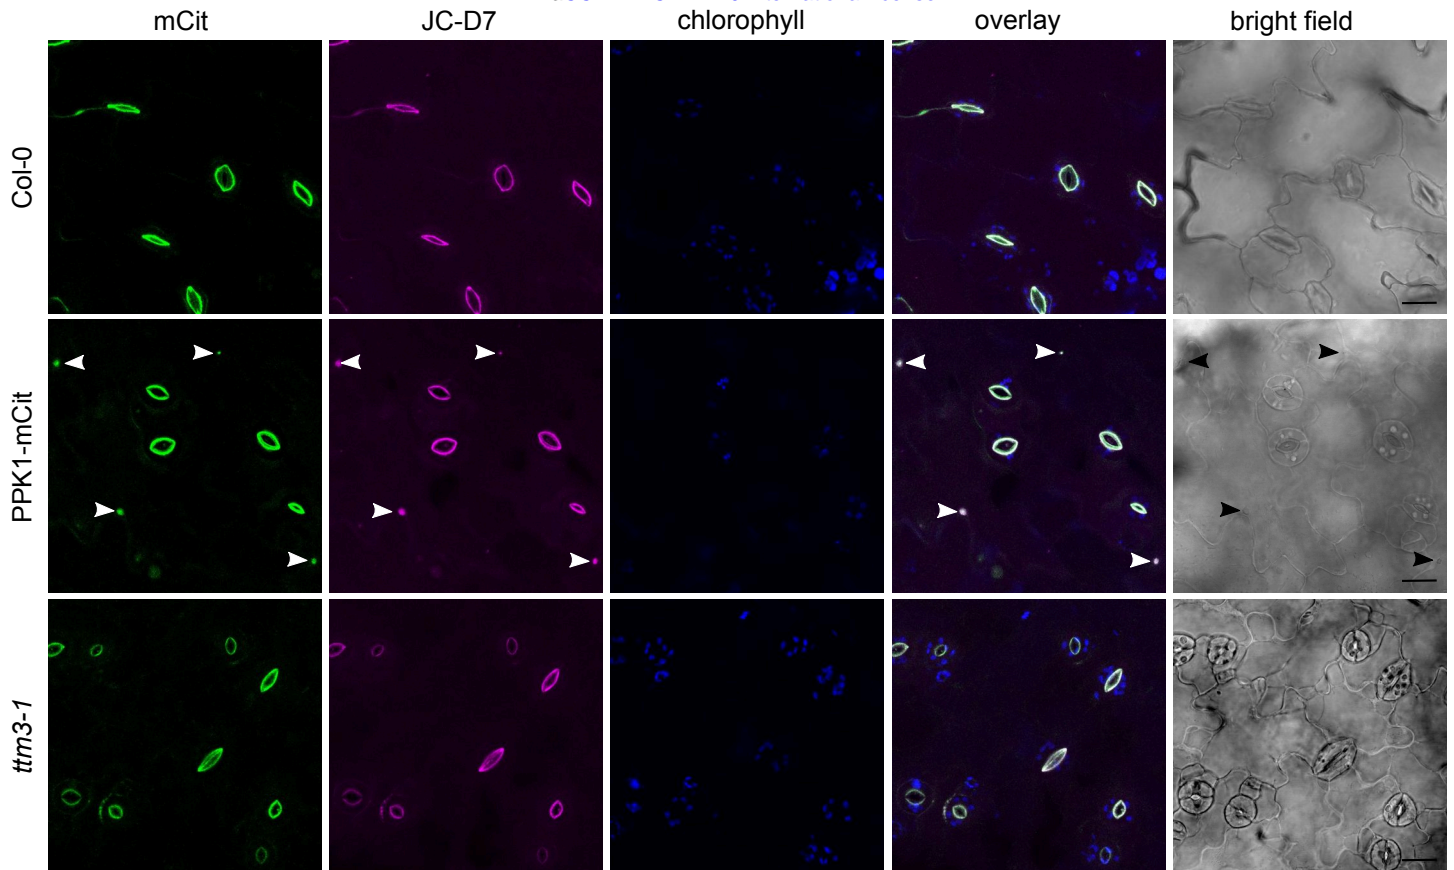

**Figure S3. JC-D7 fails to stain specific structures in fixed hypocotyl cells of Col-0 and *ttm3-1* plants.**

Samples were grown and imaged as described in Figure S2, using a fixation protocol specified in Experimental Procedures. Scale bars = 20  $\mu$ m.

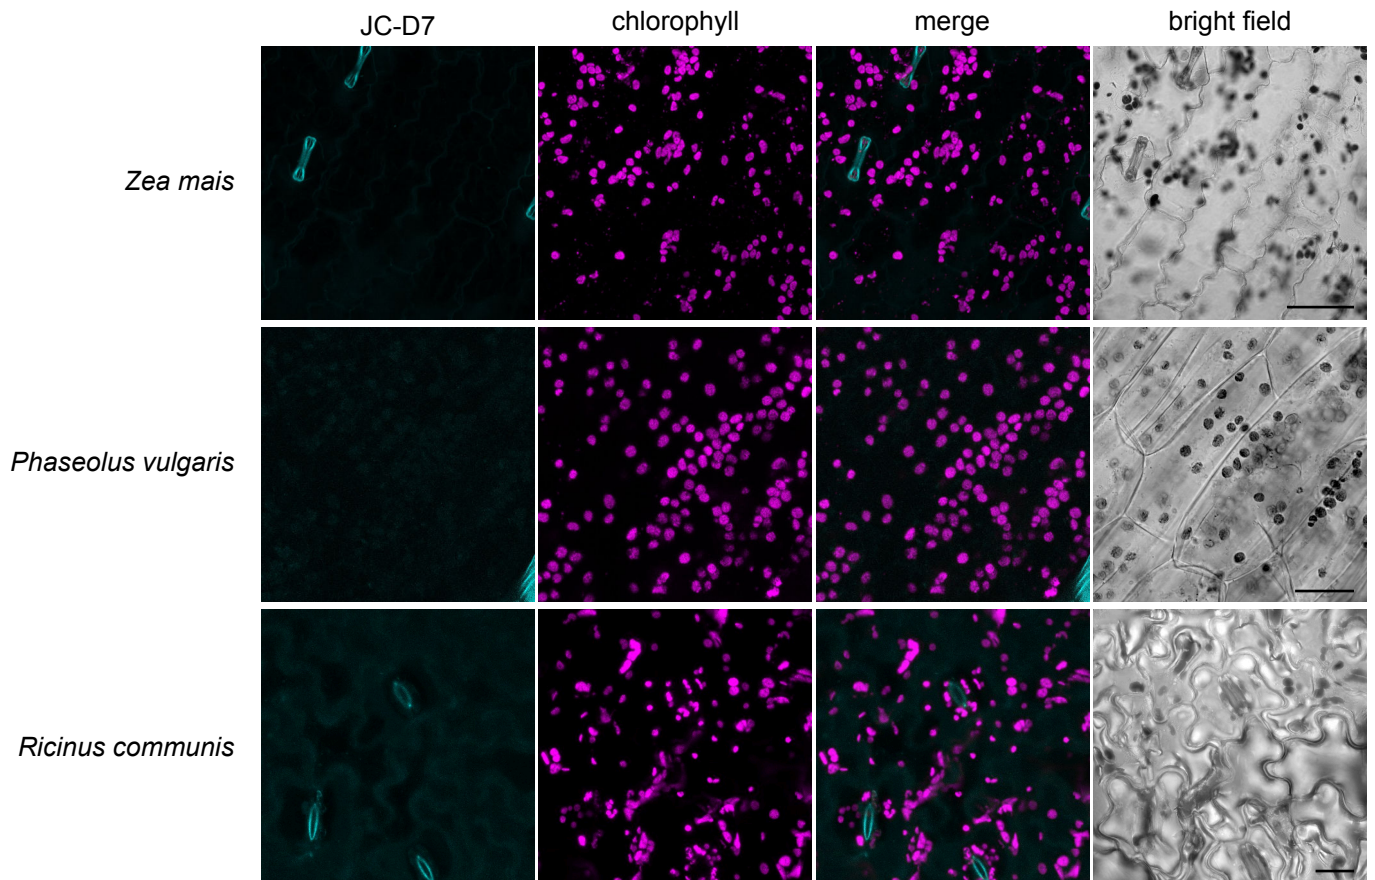

**Figure S4. No JC-D7 stained polyP granules could be detected in epidermal cells of mono- and dicotyledonous plants.**

Epidermal cells from *Zea mais*, *Phaseolus vulgaris* and *Ricinus communis* were stained using the JC-D7 dye. No specific polyP signal was detected by confocal scanning microscopy.
